# Supplementary material
Source: PubMed Central journal article supplement (PMC3299483)
Supplement: NIHMS340924-supplement-01.pdf [file NIHMS340924-supplement-01.pdf]

Type of file: table

Label: Table

Filename: 1213841tables7.pdf
